# Supplementary material for: CRISPR/Cas9-Mediated Mutagenesis of MdCNGC2 in Apple Callus and VIGS-Mediated Silencing of MdCNGC2 in Fruits Improve Resistance to Botryosphaeria dothidea
Source: PubMed Central journal article supplement (PMC7680757; doi:10.3389/fpls.2020.575477), 2020-11-09
Supplement: Data_Sheet_1.pdf [file Data_Sheet_1.pdf]

## *Supplementary Material*

### **1 Supplementary Figures and Tables**

#### **1.1 Supplementary Figures**

>MdU6 promoter

```
ACCCGCAAGGAATTTAAGTTAATATGGCCAATTCCTTGATGATGAGAATCATCATT
CCTGTAGCAGTGTTATTAAGAGAATAACCGATGAATTCCTTGCTAACTTATTGGGT
GCTAAGTATTATTGGATCGAGAACATGATTTGTGTTAGTTTTACATATATAAAATA
AATGGGTAAAGAGTTACCTGTTTATAATCACGGTTAATACCTATAACCGCCCATT
AAATTTTGCGGGTAAACGGTTATACCCATAACCGTTTATTTATCTAAACGGTTATCC
ATAACCGTAACCATTTAATTTAAATGGACGGGTAACCGCGGTTACCCATAACCAAT
GGGTATTTGCCCATCTTTATTTATGATTGAGGATACTCAGTCCACATAGGAAAGCC
CAAGGTGGGAAAAAAAGTTGACCATTAAGGACGGAAGCCAGCGTCCCACATCG
GCCAAAACAAGGTTTCTAAACGACTTTATATACTCTTACTTGAAGGTAATGCTT
```

**Figure S1.** Sequence of the MdU6 promoter.

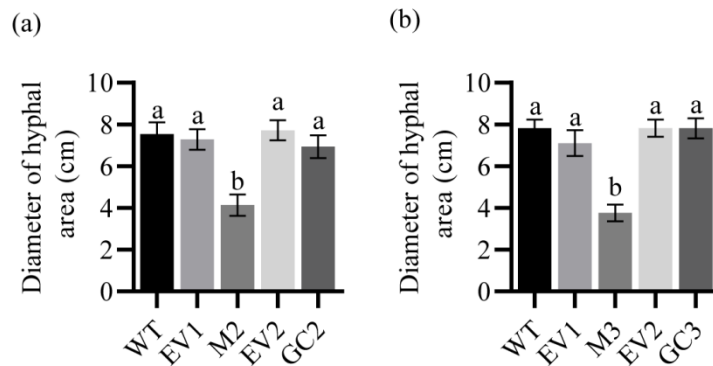

**Figure S2.** Quantitation of hyphal spread of *B. dothidea* on mutation callus. (a) The second line and (b) the third line of MdcNNGC2 mutation. Different letters indicate a significant difference ( $p < 0.05$ ). Bars represents the mean  $\pm$  SD ( $n = 5$ ). Statistical significance was determined using one-way ANOVA followed by Tukey's test. EV1, the callus transformed with pHDE-35S-Cas9-mCherry-UBQ, an empty vector used here for gene editing; M2, M3, apple callus with the mutant MdcNNGC2 gene; EV2, the callus transformed with pRI101, an empty vector for genetic complementation. GC2, GC3, the callus expressing the MdcNNGC2 gene with silent mutation at the PAM site and target sequences.

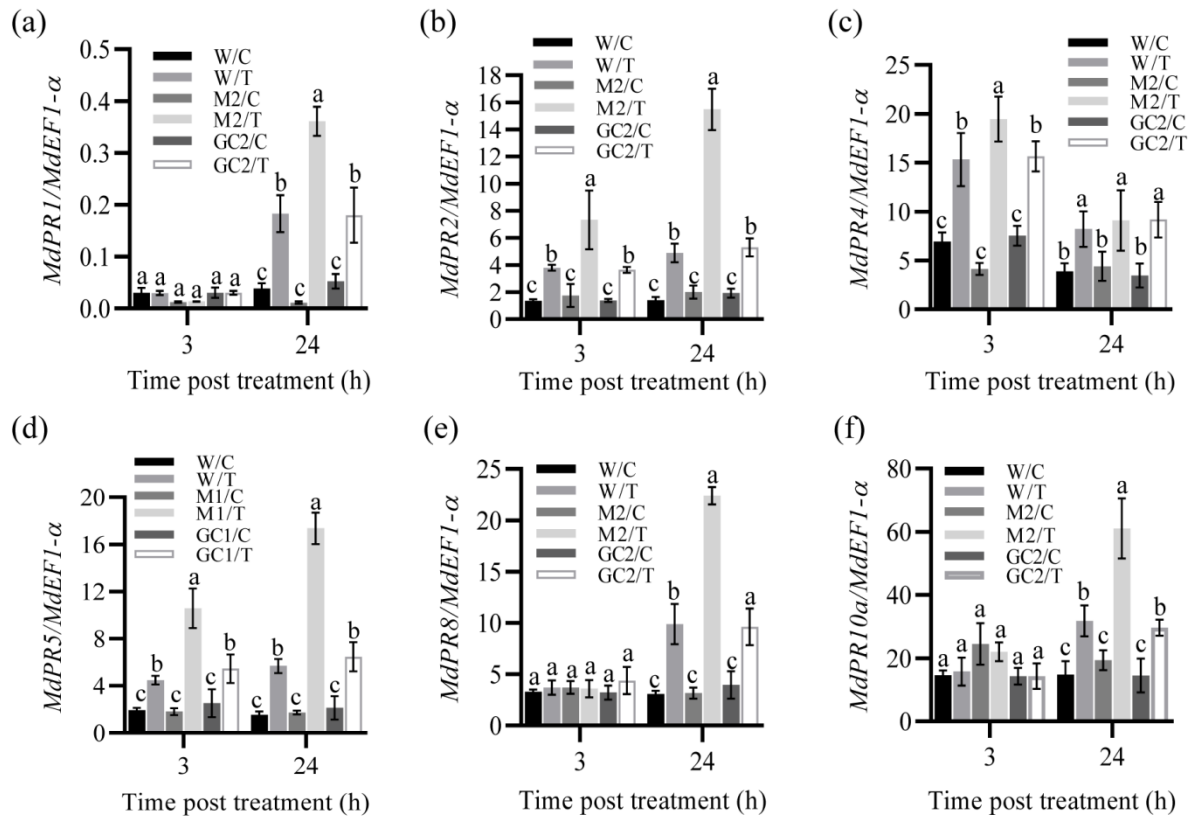

**Figure S3.** Effects of the second line of *MdCNGC2* mutation on the expression of defense-related genes. a-f show the relative expression of *MdPR1*, *MdPR2*, *MdPR4*, *MdPR5*, *MdPR8* and *MdPR10a*, respectively, in M2 line compared to WT and GC2. W/C, WT callus treated with  $5 \times$  diluted PDB and used as a control. W/T, WT callus treated with BCF. M2/C, the second mutated callus line treated with  $5 \times$  diluted PDB was used as a control. M2/T, the second mutated callus line treated with BCF. The expression of pathogenesis-related (PR) genes was determined using qRT-PCR. The *MdeF1-α* gene was used as an internal reference. GC2, the callus expressing the *MdCNGC2* gene with silent mutation at the PAM site and target sequences. The data are presented as the mean  $\pm$  SD ( $n = 4$ ). Statistical significance was determined by two-way ANOVA followed by Tukey's post-hoc test. Different letters indicate a significant difference ( $p < 0.05$ ).

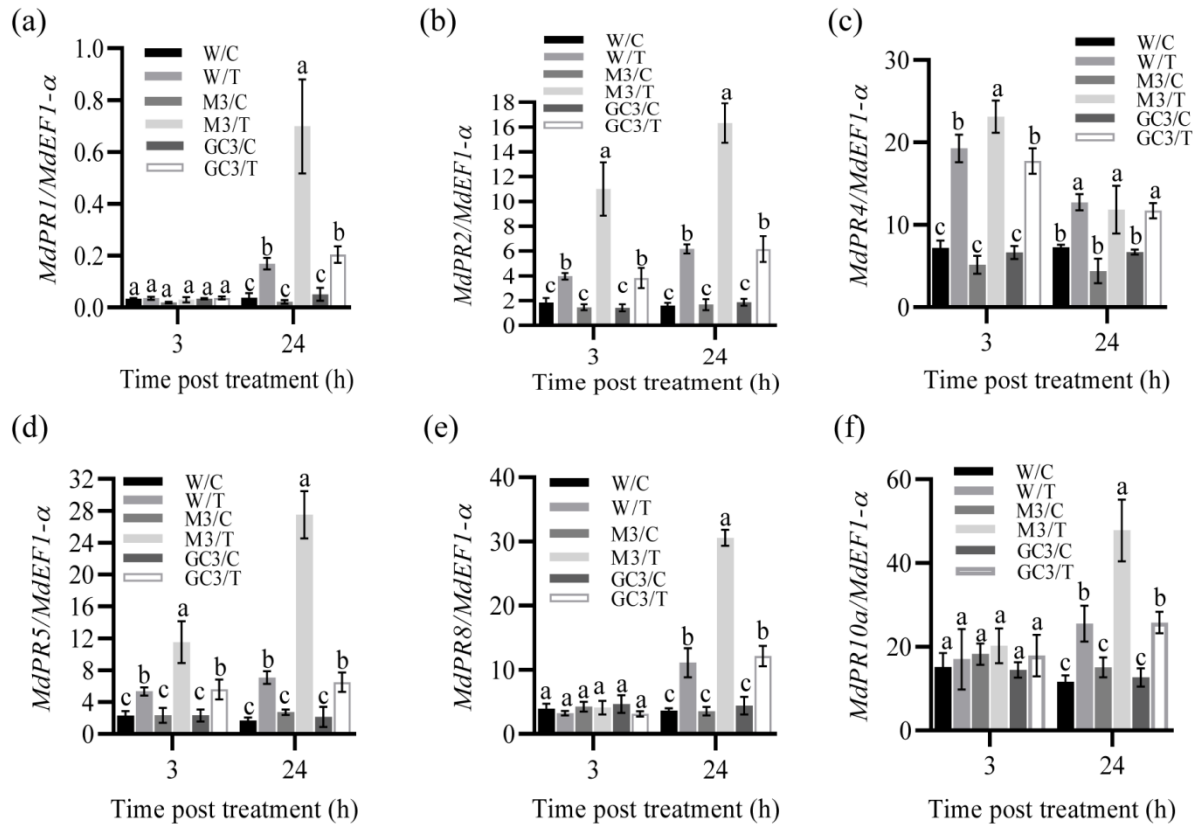

**Figure S4.** Effects of the third line of *MdCNGC2* mutation on the expression of defense-related genes. a-f show the relative expression of *MdPR1*, *MdPR2*, *MdPR4*, *MdPR5*, *MdPR8* and *MdPR10a*, respectively, in M3 line compared to WT and GC3. W/C, WT callus treated with 5 × diluted PDB and used as a control. W/T, WT callus treated with BCF. M3/C, the third mutated callus line treated with 5 × diluted PDB was used as a control. M3/T, the third mutated callus line treated with BCF. GC3, the callus expressing the *MdCNGC2* gene with silent mutation at the PAM site and target sequences. The expression of pathogenesis-related (PR) genes was determined using qRT-PCR. The *MdEF1-α* gene was used as an internal reference. The data are presented as the mean ± SD (n = 4). Statistical significance was determined by two-way ANOVA followed by Tukey's post-hoc test. Different letters indicate a significant difference ( $p < 0.05$ ).

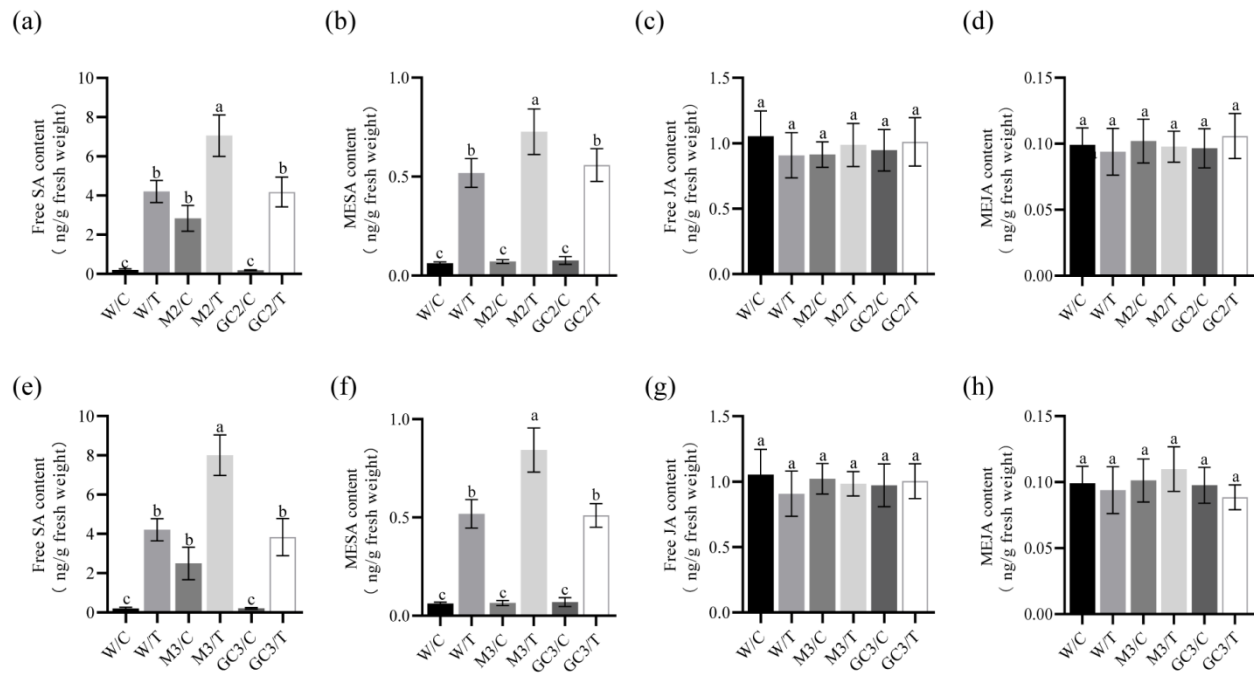

**Figure S5.** SA and JA contents in the second (a-d) and third (e-h) callus lines of *MdcNCGC2* mutation. W/C, WT treated with  $5 \times$  diluted PDB and used as a control. The three mutation callus lines were compared to the same WT control. W/T, WT callus treated with BCF. M/C, mutated calli treated with  $5 \times$  diluted PDB were used as a control. M/T, mutated callus treated with BCF. GC/C, GC callus treated with  $5 \times$  diluted PDB. GC/T, GC callus treated with BCF. The data are presented as the mean  $\pm$  SD ( $n = 5$ ). Statistical significance was determined by one-way ANOVA followed by Tukey's post-hoc test. Different letters indicate a significant difference ( $p < 0.05$ ).

## 1.2 Supplementary Figures and Tables

Table S1. The primers used in this study

| Primer name                                                 | Primer sequence (5'→3')                    |
|-------------------------------------------------------------|--------------------------------------------|
| <b>The full-length cDNA primers</b>                         |                                            |
| FL-MdCCNGC2-F                                               | ATGTCCTCCTCCCAGTTCTTCC                     |
| FL-MdCNGC2-R                                                | TTATTCAAGGTGATCGTGTGGC                     |
| MdU6-F                                                      | ACCCGCAAGGAATTTAAGTTAA                     |
| MdU6-R                                                      | AAGCATTACCTTCAAGTAAGAG                     |
| <b>Primers used for construction of gene editing vector</b> |                                            |
| mCNGC2-RG1-F1                                               | CCACTCTGCCTGGATGTCAAGTTTTAGAGCTAGAAATAGC   |
| mCNGC2-RG1-F2                                               | GGACGAAACGAGTAAGCTCGTCCCCTCTGCCTGGATGTCAA  |
| mCNGC2-RG1-F3                                               | GAGTGGCTGATGAGTCCGTGAGGACGAAACGAGTAAGCTCG  |
| MdU6-pHDE-F                                                 | GTCAAACACTGATAGTTTAAACCCGCAAGGAATTTAAGTT   |
| MdU6-pHDE-R                                                 | CCAAGCTTCACTTCACTAGTCACCTGAGTGCAGGCGTAGC   |
| CNGC2T2-MdU6-R                                              | CACCTGAGTGCAGGCGTAGCAAGCATTACCTTCAAGTAAGAG |
| CNGC2T2-U6ter-F                                             | GCTACGCCTGCACTCAGGTGGTTTTAGAGCTAGAAATAGC   |
| U6ter-pHDE-R                                                | TTGAGACCAAGCTTCACTTCCCATCAGAGGTGTAACGGAA   |
| RGR-pHDE-F                                                  | TTTTTCTGATTAACAGCTCGGAGTGGCTGATGAGTCCGTG   |
| RGR-pHDE-R                                                  | GCTAGCTTACTCAGTTAGGTGTCCCATTCGCCATGCCGAA   |
| RGRs-R                                                      | GTCCCATTCCGCCATGCCGAA                      |
| <b>Primer for detection of mutation in target sequence</b>  |                                            |
| Crispr-CNGC2-Target1-F                                      | AGAACTCCCAGAGCGACGACA                      |
| Crispr-CNGC2-Target1-R                                      | TACGAACGTGAGGCGAGAAAA                      |
| Crispr-CNGC2-Target2-F                                      | TCTTGCTCGGACGAAGTTTGC                      |
| Crispr-CNGC2-Target2-R                                      | AACGGCGTGGAGAAATACCTG                      |
| <b>Quantitative real-time PCR primers</b>                   |                                            |
| MdCNGC2-192-F                                               | CATCTGCGACATTCACCTGC                       |
| MdCNGC2-192-R                                               | ACCTGTAGCGACGCCAAGTA                       |
| MdEFa-F                                                     | CAAGGCAAGGTACGAGGAA                        |
| MdEFa-R                                                     | GAAGTGGAAGACGGAGGG                         |
| MdPR1-F                                                     | AGTAGGCGTTGGTCCCTT                         |
| MdPR1-R                                                     | ACTGTAGTCGGCTTTCTCC                        |
| MdPR2-F                                                     | TTGATAATGCGAGGACTT                         |
| MdPR2-R                                                     | GGGTATTTAGGCTGTTTG                         |
| MdPR4-F                                                     | CCACATACCACCTCTACAATC                      |
| MdPR4-R                                                     | AAAGGCAGTCCATCCATAT                        |
| MdPR5-F                                                     | AACTTGCCTATGTCTGTGCG                       |
| MdPR5-R                                                     | CCATCAGCCGCTTTCCT                          |
| MdPR8-F                                                     | CAACTCGGGCAACTACCA                         |
| MdPR8-R                                                     | GTTCTGATGTCGGCACTCT                        |
| MdPR10-F                                                    | AAACTACTCATACGCCTACAC                      |
| MdPR10-R                                                    | TTGATCTCAACATCACCTT                        |
| <b>Primers for VIGS</b>                                     |                                            |
| VIGS-MdCNGC2-F                                              | CGGAATTCCCATCTTTTTGGGGTTTAA                |
| VIGS-MdCNGC2-R                                              | CGAGCTCTCCATCTCATCTTCTCCC                  |
| <b>Primers for genetic complement</b>                       |                                            |
| MdCNGC2-mut-F1                                              | GTTATGCATGTACCCAAGTCGGGGTCCCAGCCTTTCCTC    |
| MdCNGC2-mut-R1                                              | GACTTGGGTACATGCATAACATTCGACGGAGTTGGAGATG   |
| MdCNGC2-mut-F2                                              | CCGTTGTGTTTAGACGTAAATGGCACATTTAACTATGGAA   |

MdCNGC2-mut-R2  
pRI101-*MdCNGC2*-mut-F  
pRI101-*MdCNGC2*-mut-R

TTTACGTCTAAACACAACGGCGGCTTTCTCATCACGCTTG  
CGGGATCCATGTCCTCCTCCCAGTTCTT  
ATTCGAGCTCACTAGTGGATCCTCA

---

**Table S2\*. The genes used in the present study**

| <b>Name</b>     | <b>Species</b>         | <b>Accession</b> |
|-----------------|------------------------|------------------|
| <i>AtCNGC1</i>  | <i>A. thaliana</i>     | At5G53130        |
| <i>AtCNGC2</i>  | <i>A. thaliana</i>     | At5g15410        |
| <i>AtCNGC3</i>  | <i>A. thaliana</i>     | At2g46430        |
| <i>AtCNGC4</i>  | <i>A. thaliana</i>     | At5g54250        |
| <i>AtCNGC5</i>  | <i>A. thaliana</i>     | At5g57940        |
| <i>AtCNGC6</i>  | <i>A. thaliana</i>     | At2g23980        |
| <i>AtCNGC7</i>  | <i>A. thaliana</i>     | At1g15990        |
| <i>AtCNGC8</i>  | <i>A. thaliana</i>     | At1g19780        |
| <i>AtCNGC9</i>  | <i>A. thaliana</i>     | At4g30560        |
| <i>AtCNGC10</i> | <i>A. thaliana</i>     | At1g01340        |
| <i>AtCNGC11</i> | <i>A. thaliana</i>     | At2g46440        |
| <i>AtCNGC12</i> | <i>A. thaliana</i>     | At2g46450        |
| <i>AtCNGC13</i> | <i>A. thaliana</i>     | At4g01010        |
| <i>AtCNGC14</i> | <i>A. thaliana</i>     | At2g24610        |
| <i>AtCNGC15</i> | <i>A. thaliana</i>     | At2g28260        |
| <i>AtCNGC16</i> | <i>A. thaliana</i>     | At3g48010        |
| <i>AtCNGC17</i> | <i>A. thaliana</i>     | At4g30360        |
| <i>AtCNGC18</i> | <i>A. thaliana</i>     | At5g14870        |
| <i>AtCNGC19</i> | <i>A. thaliana</i>     | At3g17690        |
| <i>AtCNGC20</i> | <i>A. thaliana</i>     | At3g17700        |
| <i>OsCNGC2</i>  | <i>O. sativa</i>       | Os06g0527100     |
| <i>OsCNGC4</i>  | <i>O. sativa</i>       | ABF97880         |
| <i>OsCNGC7</i>  | <i>O. sativa</i>       | Os02g0627700     |
| <i>OsCNGC14</i> | <i>O. sativa</i>       | Os03g0758300     |
| <i>OsCNGC15</i> | <i>O. sativa</i>       | Os01g0782800     |
| <i>OsCNGC16</i> | <i>O. sativa</i>       | Os05g0502000     |
| <i>MdCNGC2</i>  | <i>Malus domestica</i> | MD17G1056400     |
| <i>SICNGC5</i>  | <i>S. lycopersicum</i> | Solyc06g051920   |
| <i>SICNGC6</i>  | <i>S. lycopersicum</i> | Solyc03g007260   |
| <i>MdPR1a</i>   | <i>Malus domestica</i> | MD05G1109100     |
| <i>MdPR2</i>    | <i>Malus domestica</i> | MD14G1080100     |
| <i>MdPR4</i>    | <i>Malus domestica</i> | MD04G1225400     |
| <i>MdPR5</i>    | <i>Malus domestica</i> | MD09G1256300     |
| <i>MdPR8</i>    | <i>Malus domestica</i> | MD01G1213300     |
| <i>MdPR10</i>   | <i>Malus domestica</i> | MD16G1160700     |

\* The gene sequences of apple, Arabidopsis, rice and tomato were retrieved from genomic database of apple (<https://iris.angers.inra.fr/gddh13/>), Arabidopsis (<http://www.arabidopsis.org/>), rice (<http://www.ricedata.cn/gene/>), and tomato (<https://solgenomics.net/>), respectively.
